# Supplementary material for: Intratracheally administered LNA gapmer antisense oligonucleotides induce robust gene silencing in mouse lung fibroblasts
Source: PubMed Central journal article supplement (PMC9410908; doi:10.1093/nar/gkac630), 2022-08-03
Supplement: gkac630_supplemental_file.pdf [file gkac630_supplemental_file.pdf]

## SUPPLEMENTARY DATA

### **Intratracheally administered LNA gapmer antisense oligonucleotides induce robust gene silencing in mouse lung fibroblasts**

Minwook Shin<sup>1</sup>, Io Long Chan<sup>1</sup>, Yuming Cao<sup>2</sup>, Alisha M. Gruntman<sup>3,4,5</sup>, Jonathan Lee<sup>1</sup>, Jacquelyn Sousa<sup>1</sup>, Tomás C. Rodríguez<sup>1</sup>, Dimas Echeverria<sup>1</sup>, Gitali Devi<sup>1</sup>, Alexandre J. Debacker<sup>1</sup>, Michael P. Moazami<sup>1</sup>, Pranathi Meda Krishnamurthy<sup>1</sup>, Julia Rembetsy-Brown<sup>1</sup>, Karen Kelly<sup>1</sup>, Onur Yukselen<sup>2</sup>, Elisa Donnard<sup>2</sup>, Teagan J. Parsons<sup>6,7</sup>, Anastasia Khvorova<sup>1,6</sup>, Erik J. Sontheimer<sup>1,6,8</sup>, René Maehr<sup>6,7</sup>, Manuel Garber<sup>2,6</sup>, and Jonathan K. Watts<sup>1,8,9,\*</sup>

<sup>1</sup> RNA Therapeutics Institute, University of Massachusetts Chan Medical School, Worcester, MA, 01605, USA

<sup>2</sup> Program in Bioinformatics and Integrative Biology, University of Massachusetts Chan Medical School, Worcester, MA, 01605, USA

<sup>3</sup> Horae Gene Therapy Center, University of Massachusetts Chan Medical School, Worcester, MA, 01605, USA

<sup>4</sup> Department of Pediatrics, University of Massachusetts Chan Medical School, Worcester, MA, 01605, USA

<sup>5</sup> Department of Clinical Sciences, Cummings School of Veterinary Medicine at Tufts University, N. Grafton, MA, 01536, USA

<sup>6</sup> Program in Molecular Medicine, University of Massachusetts Chan Medical School, Worcester, MA, 01605, USA

<sup>7</sup> Diabetes Center of Excellence, University of Massachusetts Chan Medical School, Worcester, MA, 01605, USA

<sup>8</sup> Li Weibo Institute for Rare Diseases Research, University of Massachusetts Chan Medical School, Worcester, MA, 01605, USA

<sup>9</sup> Department of Biochemistry and Molecular Biotechnology, University of Massachusetts Chan Medical School, Worcester, MA, 01605, USA

\* To whom correspondence should be addressed. Tel: +1-774-455-3784; Fax: +1-508-856-6696; Email: Jonathan.Watts@umassmed.edu

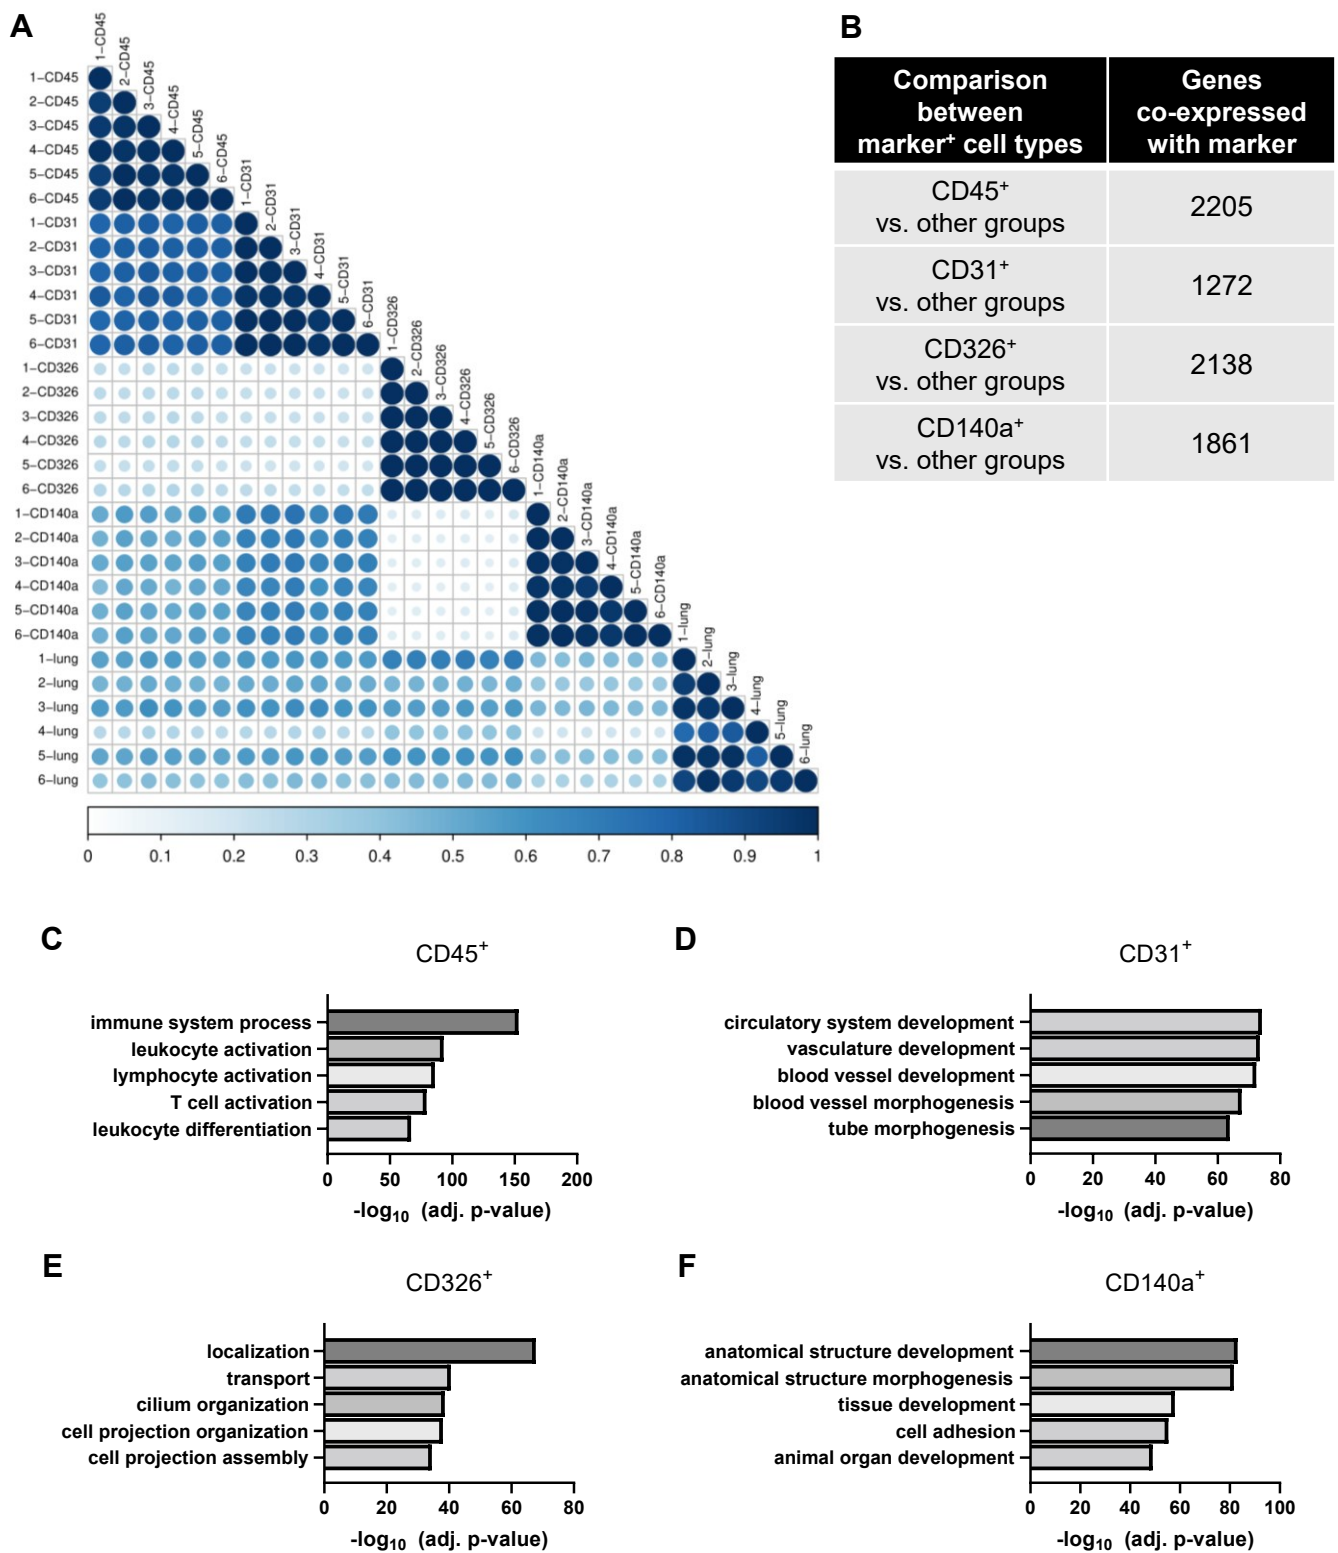

**Supplementary Figure S1.** Overview of RNA sequencing results. **(A)** Overall gene expression in each sorted cell-marker-positive group and bulk lung tissue correlates strongly with its own cell or tissue type between biological replicates. Scale represents Pearson correlation (0 to 1), and color intensity and size are proportional to correlation. Numbers 1-6 represent individual mice. **(B)** Differentially expressed genes that were upregulated in each group compared to all other groups (>2-fold, adjusted  $P$ -value<0.05). **(C-F)** Gene ontology analysis of the upregulated genes from panel B.



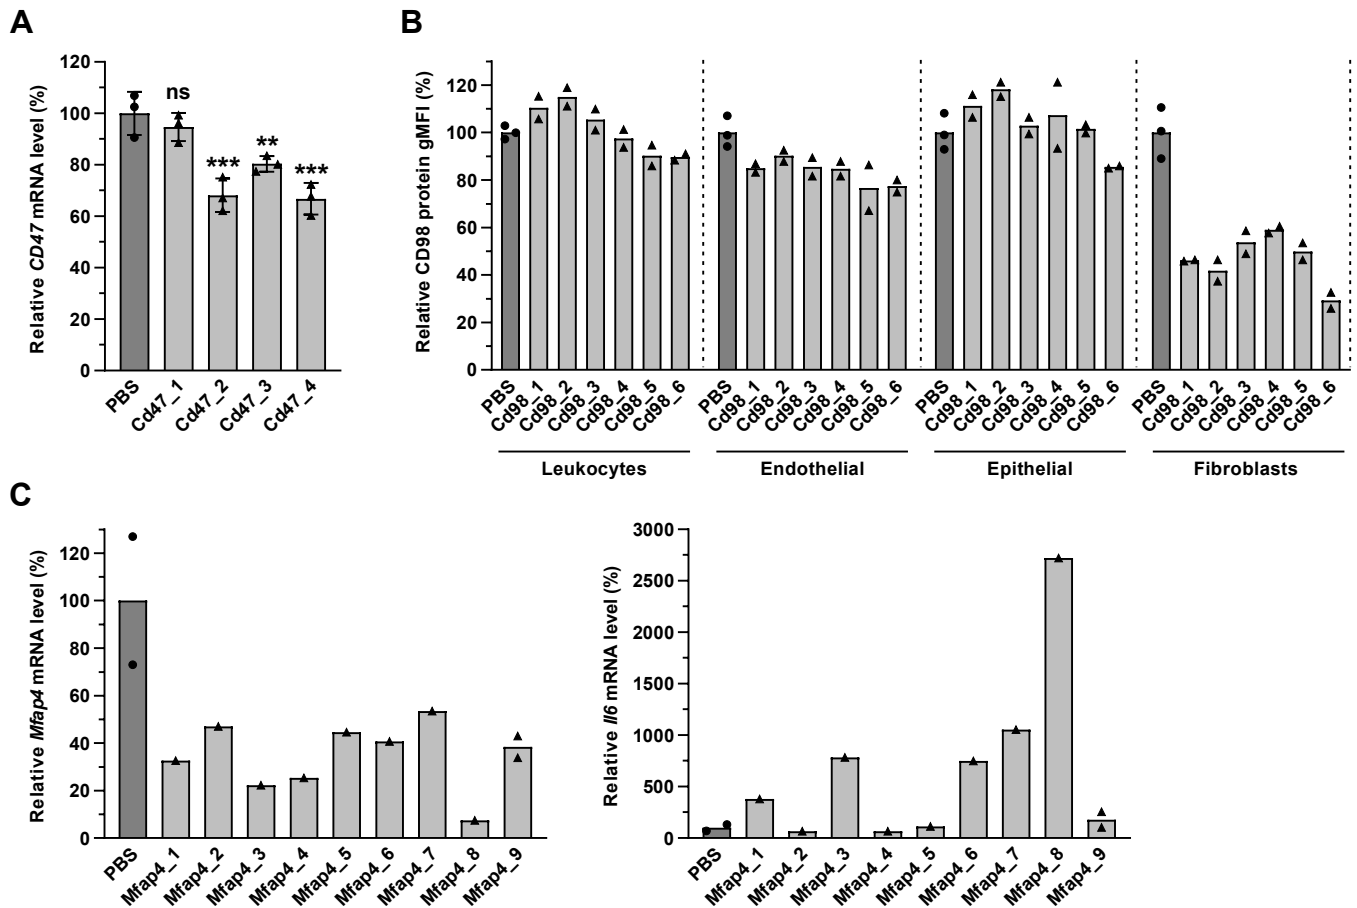

**Supplementary Figure S3.** In vivo screening for LNA gapmer ASOs to find lead compounds.

**(A)** Mice were intratracheally administered 10 nmol (~2.2 mg kg<sup>-1</sup>) of ASO targeting *Cd47* or PBS (n=3), and lungs were collected 2 days later. The silencing of *Cd47* mRNA was measured with RT-qPCR and normalized with *Ppib* mRNA level. Data are presented relative to the PBS group. \*\**P* < 0.01, \*\*\**P* < 0.001 versus the PBS group (one-way ANOVA). **(B)** Mice were intratracheally administered 20 nmol (~4.3 mg kg<sup>-1</sup>) of ASO targeting *Cd98* (n=2) or PBS (n=3), and lungs were collected after 4 weeks subsequently analyzed by flow cytometry staining with VioGreen-CD45, APC-CD31, FITC-CD326, PE-Vio770-CD140a, and PE-CD98 antibodies, and SYTOX Blue Live/Dead cell dye. The CD98 protein level of ASO-treated groups presented relative to the PBS group of each cell type. **(C)** Mice were intratracheally administered 20 nmol (~4.3 mg kg<sup>-1</sup>) of ASO targeting *Mfap4* or PBS (n=1-2), and lungs were collected 2 days later. The silencing of *Mfap4* mRNA and induction of *Il6* mRNA were measured with RT-qPCR and normalized with *Ppib* mRNA level. Data are presented relative to the PBS group. Data are presented as Mean ± SD (A) or Geo Mean (B) or Mean (B) with values of the individual animals as dots.

| Target       | Oligo name | Sequence (5'-3')                     | Calculated mass | Observed mass |
|--------------|------------|--------------------------------------|-----------------|---------------|
| <i>Cd47</i>  | Cd47_1     | +A+G+CdTdGdAdAd5Cd5CdGd5CdAdG+C+A+G  | 5379.4          | 5378.6        |
|              | Cd47_2     | +A+C+GdGdAd5CdGdAdTdGd5CdAdA+G+G+G   | 5431.4          | 5430.6        |
|              | Cd47_3     | +C+C+GdTdGd5CdGdGdTdTdTdT+C+A+G      | 5344.3          | 5343.5        |
|              | Cd47_4     | +G+T+Gd5CdTdTdGdGd5CdGdAdGdT+C+T+C   | 5369.3          | 5368.5        |
| <i>Cd98</i>  | Cd98_1     | +G+G+CdTdGd5CdTdTd5Cd5CdG+G+T+T      | 5334.4          | 5333.6        |
|              | Cd98_2     | +C+C+GdTd5Cd5CdGd5CdTdGd5CdAdT+T+C+A | 5300.4          | 5299.7        |
|              | Cd98_3     | +G+G+CdTdGd5Cd5CdAdGdTdGdGd5C+A+T+T  | 5378.4          | 5377.5        |
|              | Cd98_4     | +G+C+AdGd5CdTdGdGdTdAdGdAdG+T+C+G    | 5413.3          | 5412.6        |
|              | Cd98_5     | +G+C+AdAd5CdAdGdAdGdAdGd5CdG+C+T+C   | 5379.4          | 5378.7        |
|              | Cd98_6     | +A+C+CdGdGd5Cd5Cd5CdGdAdAdTd5C+T+C+G | 5334.4          | 5333.7        |
| <i>Mfap4</i> | Mfap4_1    | +G+C+AdTd5CdAdGdTdGdGd5CdAdG+G+G+C   | 5412.4          | 5411.6        |
|              | Mfap4_2    | +C+T+GdAdTdAdGd5Cd5Cd5CdTdGdG+G+C+G  | 5377.4          | 5376.6        |
|              | Mfap4_3    | +T+T+Cd5CdAdAdGdTd5Cd5CdAd5CdG+C+G+C | 5309.4          | 5308.7        |
|              | Mfap4_4    | +C+C+AdTdTdGdGdGd5Cd5Cd5CdAdA+T+T+G  | 5336.4          | 5335.6        |
|              | Mfap4_5    | +C+T+Cd5CdGdTdGd5CdGd5CdTdTdG+A+G+G  | 5368.4          | 5367.6        |
|              | Mfap4_6    | +T+G+CdTdGdAd5CdAdGd5Cd5CdTdA+G+C+C  | 5335.4          | 5334.6        |
|              | Mfap4_7    | +G+G+TdGdGdGdGdTdGd5CdAdAdA+A+G+C    | 5448.4          | 5447.6        |
|              | Mfap4_8    | +A+C+AdGdGdTdGd5CdTdGd5CdAdT+G+A+C   | 5371.4          | 5370.6        |
|              | Mfap4_9    | +T+G+Gd5CdAdAdTdGd5Cd5CdAd5CdA+G+G+T | 5371.4          | 5370.6        |

**Supplementary Table S1.** Gapmer ASOs used in Supplementary Figure S3. dN = DNA, +N = LNA, uN = 2'-O-MOE, d5C = 5-methyl-deoxycytosine. All internucleotide linkages were phosphorothioate.

**Figure 1A**

| Gene          | Technical replicate | PBS   |       |       |       |       | 2'-O-MOE Malat1_1 |       |       |       |       | LNA Malat1_2 |       |       |       |       |
|---------------|---------------------|-------|-------|-------|-------|-------|-------------------|-------|-------|-------|-------|--------------|-------|-------|-------|-------|
|               |                     | 1     | 2     | 3     | 4     | 5     | 1                 | 2     | 3     | 4     | 5     | 1            | 2     | 3     | 4     | 5     |
| <i>Ppib</i>   | a                   | 24.16 | 24.05 | 24.40 | 23.85 | 24.49 | 25.54             | 24.80 | 25.96 | 25.28 | 25.65 | 25.36        | 26.02 | 25.47 | 25.89 | 24.94 |
|               | b                   | 24.20 | 24.22 | 24.66 | 23.88 | 24.78 | 25.57             | 24.82 | 25.93 | 25.07 | 25.52 | 25.29        | 25.95 | 25.46 | 25.90 | 24.93 |
| <i>Malat1</i> | a                   | 19.15 | 18.53 | 18.79 | 18.25 | 18.40 | 21.11             | 21.01 | 21.51 | 20.32 | 21.48 | 22.69        | 22.98 | 22.85 | 23.27 | 21.37 |
|               | b                   | 18.88 | 18.37 | 18.61 | 18.29 | 18.45 | 21.10             | 20.85 | 21.45 | 20.31 | 21.49 | 22.64        | 22.98 | 23.11 | 23.41 | 21.50 |

**Figure 1B**

| Tissue                 | Gene          | Technical replicate | PBS   |       |       |       |       | Malat1_3 |       |       |       |       |
|------------------------|---------------|---------------------|-------|-------|-------|-------|-------|----------|-------|-------|-------|-------|
|                        |               |                     | 1     | 2     | 3     | 4     | 5     | 1        | 2     | 3     | 4     | 5     |
| Bronchus               | <i>Ppib</i>   | A                   | 22.43 | 22.38 | 21.96 | 22.60 | 22.36 | 23.01    | 22.21 | 22.82 | 22.35 | 22.64 |
|                        |               | B                   | 22.03 | 22.06 | 21.67 | 22.29 | 21.91 | 22.63    | 21.93 | 22.50 | 22.11 | 22.46 |
|                        | <i>Malat1</i> | a                   | 16.40 | 16.50 | 16.70 | 17.07 | 17.30 | 19.03    | 18.18 | 18.07 | 17.55 | 18.18 |
|                        |               | b                   | 16.27 | 16.28 | 16.52 | 16.89 | 17.02 | 18.69    | 18.03 | 17.91 | 17.38 | 18.22 |
| Left lobe (proximal)   | <i>Ppib</i>   | a                   | 22.62 | 23.08 | 22.28 | 22.43 | 22.30 | 22.35    | 22.10 | 22.53 | 22.92 | 22.14 |
|                        |               | b                   | 22.13 | 22.29 | 21.93 | 22.04 | 22.04 | 22.02    | 22.08 | 22.51 | 22.57 | 22.39 |
|                        | <i>Malat1</i> | a                   | 15.64 | 15.90 | 15.63 | 15.49 | 15.84 | 17.54    | 16.94 | 17.97 | 18.07 | 17.64 |
|                        |               | b                   | 15.49 | 15.61 | 15.21 | 15.46 | 15.44 | 17.69    | 17.12 | 17.69 | 17.97 | 17.65 |
| Inferior lobe (distal) | <i>Ppib</i>   | a                   | 23.43 | 24.13 | 23.42 | 23.51 | 23.68 | 24.84    | 24.53 | 24.62 | 23.94 | 24.80 |
|                        |               | b                   | 23.20 | 23.88 | 23.32 | 23.44 | 23.40 | 24.43    | 24.25 | 24.33 | 23.85 | 24.73 |
|                        | <i>Malat1</i> | a                   | 17.69 | 18.43 | 17.29 | 17.16 | 17.25 | 20.78    | 19.70 | 20.46 | 20.20 | 20.92 |
|                        |               | b                   | 17.15 | 17.96 | 17.23 | 17.16 | 17.21 | 20.44    | 19.55 | 20.36 | 20.05 | 20.33 |

**Figure 1C**

| Tissue | Gene          | Technical replicate | PBS   |       |       |       |       |       | NTC_1 |       |       |       |       |       | Malat1_3 |       |       |       |       |       |
|--------|---------------|---------------------|-------|-------|-------|-------|-------|-------|-------|-------|-------|-------|-------|-------|----------|-------|-------|-------|-------|-------|
|        |               |                     | 1     | 2     | 3     | 4     | 5     | 6     | 1     | 2     | 3     | 4     | 5     | 6     | 1        | 2     | 3     | 4     | 5     | 6     |
| Lung   | <i>Ppib</i>   | a                   | 24.12 | 24.28 | 23.83 | 23.56 | 24.18 | 23.44 | 25.09 | 24.68 | 24.33 | 24.94 | 24.52 | 24.64 | 24.34    | 24.23 | 24.08 | 24.52 | 24.53 | 24.52 |
|        |               | b                   | 24.08 | 24.22 | 23.81 | 23.64 | 24.23 | 23.46 | 24.97 | 24.75 | 24.46 | 25.05 | 24.58 | 24.85 | 24.53    | 24.37 | 24.16 | 24.57 | 24.59 | 24.57 |
|        | <i>Malat1</i> | a                   | 18.42 | 18.59 | 18.11 | 17.83 | 18.35 | 17.76 | 19.22 | 18.98 | 18.79 | 19.30 | 18.64 | 19.05 | 20.93    | 20.87 | 20.82 | 21.52 | 21.27 | 21.48 |
|        |               | b                   | 18.67 | 18.62 | 18.26 | 18.03 | 18.49 | 17.98 | 19.33 | 19.13 | 18.91 | 19.46 | 18.83 | 19.13 | 21.28    | 21.15 | 21.12 | 21.70 | 21.45 | 21.78 |
| Liver  | <i>Ppib</i>   | a                   | 23.83 | 23.62 | 23.76 | 23.73 | 23.88 | 23.68 | 23.97 | 23.48 | 23.54 | 23.52 | 23.72 | 23.98 | 23.94    | 23.67 | 23.70 | 23.85 | 24.19 | 23.94 |
|        |               | b                   | 24.04 | 23.85 | 23.62 | 24.03 | 23.99 | 23.83 | 24.05 | 23.53 | 23.61 | 23.47 | 23.56 | 23.86 | 23.83    | 23.59 | 23.65 | 23.92 | 24.13 | 23.96 |
|        | <i>Malat1</i> | a                   | 20.27 | 20.13 | 20.20 | 20.26 | 20.32 | 20.26 | 20.24 | 20.21 | 20.13 | 20.12 | 20.23 | 20.40 | 21.19    | 21.47 | 20.90 | 21.14 | 21.43 | 21.39 |
|        |               | b                   | 20.38 | 20.14 | 20.22 | 20.16 | 20.27 | 20.20 | 20.55 | 20.12 | 20.07 | 20.16 | 20.27 | 20.27 | 21.30    | 21.37 | 21.06 | 21.29 | 21.58 | 21.35 |
| Kidney | <i>Ppib</i>   | a                   | 23.36 | 23.28 | 23.36 | 23.12 | 23.26 | 23.30 | 23.30 | 23.11 | 23.33 | 23.48 | 23.49 | 24.05 | 23.40    | 23.25 | 23.24 | 23.22 | 23.40 | 23.39 |
|        |               | b                   | 23.48 | 23.31 | 23.28 | 23.18 | 23.22 | 23.53 | 23.30 | 23.10 | 23.24 | 23.47 | 23.39 | 23.88 | 23.26    | 23.21 | 23.18 | 23.29 | 23.22 | 23.35 |
|        | <i>Malat1</i> | a                   | 18.06 | 18.15 | 18.16 | 18.01 | 18.14 | 18.22 | 18.16 | 18.10 | 18.05 | 18.41 | 18.37 | 18.75 | 18.47    | 18.65 | 18.64 | 18.58 | 18.58 | 18.73 |
|        |               | b                   | 18.09 | 18.04 | 18.10 | 17.88 | 18.05 | 18.18 | 18.23 | 17.99 | 17.95 | 18.28 | 18.26 | 18.59 | 18.51    | 18.37 | 18.52 | 18.47 | 18.51 | 18.59 |
| Spleen | <i>Ppib</i>   | a                   | 25.20 | 24.59 | 24.20 | 24.52 | 24.27 | 24.40 | 24.51 | 24.54 | 24.13 | 24.42 | 24.15 | 24.62 | 23.70    | 23.76 | 23.58 | 23.71 | 23.93 | 24.63 |
|        |               | b                   | 25.12 | 24.60 | 24.27 | 24.48 | 24.41 | 24.34 | 24.47 | 24.49 | 24.00 | 24.54 | 24.25 | 24.55 | 23.79    | 23.88 | 23.68 | 23.79 | 23.85 | 24.68 |
|        | <i>Malat1</i> | a                   | 20.00 | 19.35 | 19.29 | 19.13 | 18.80 | 19.01 | 18.67 | 18.72 | 18.59 | 19.05 | 18.93 | 19.24 | 18.58    | 18.61 | 18.55 | 18.56 | 19.13 | 19.35 |
|        |               | b                   | 20.18 | 19.41 | 19.47 | 19.30 | 19.05 | 19.34 | 19.11 | 19.09 | 18.61 | 19.30 | 19.27 | 19.43 | 19.08    | 18.94 | 18.91 | 18.97 | 19.23 | 19.67 |

**Supplementary Table S2. Raw Ct values of RT-qPCR analysis (Page 1/3).**

**Figure 3A**

| Time    | Gene        | Technical replicate | PBS   |       |       |       |       |       | Cd47_4 |       |       |       |       |       |
|---------|-------------|---------------------|-------|-------|-------|-------|-------|-------|--------|-------|-------|-------|-------|-------|
|         |             |                     | 1     | 2     | 3     | 4     | 5     | 6     | 1      | 2     | 3     | 4     | 5     | 6     |
| 1 week  | <i>Ppib</i> | a                   | 23.73 | 23.47 | 23.25 | 23.37 | 23.67 | 23.26 | 23.60  | 23.51 | 23.53 | 23.80 | 23.93 | 24.40 |
|         |             | b                   | 23.88 | 23.54 | 23.21 | 23.45 | 23.67 | 23.49 | 23.64  | 23.58 | 23.44 | 23.89 | 24.06 | 24.44 |
|         | <i>Cd47</i> | a                   | 22.14 | 21.79 | 21.28 | 21.56 | 21.87 | 21.23 | 22.04  | 22.26 | 22.26 | 22.86 | 23.03 | 23.37 |
|         |             | b                   | 22.16 | 21.83 | 21.43 | 21.68 | 22.04 | 21.45 | 22.20  | 22.46 | 22.37 | 23.00 | 22.99 | 23.48 |
| 2 weeks | <i>Ppib</i> | a                   | 23.00 | 23.91 | 23.33 | 23.72 | 24.12 | 23.53 | 24.11  | 24.60 | 23.36 | 24.28 | 25.08 | 25.01 |
|         |             | b                   | 23.12 | 24.01 | 23.32 | 23.68 | 24.24 | 23.62 | 24.07  | 24.60 | 23.36 | 24.40 | 25.08 | 25.22 |
|         | <i>Cd47</i> | a                   | 21.12 | 21.98 | 21.27 | 21.75 | 22.19 | 21.75 | 22.58  | 23.21 | 22.15 | 23.19 | 23.93 | 23.74 |
|         |             | b                   | 21.32 | 22.30 | 21.55 | 22.02 | 22.58 | 22.17 | 22.96  | 23.42 | 22.45 | 23.49 | 24.11 | 23.88 |
| 4 weeks | <i>Ppib</i> | a                   | 23.59 | 24.32 | 23.16 | 22.50 | 22.69 |       | 22.56  | 22.40 | 22.41 | 22.78 | 23.12 |       |
|         |             | b                   | 23.71 | 24.34 | 23.21 | 22.53 | 22.98 |       | 22.58  | 22.48 | 22.50 | 22.74 | 23.18 |       |
|         | <i>Cd47</i> | a                   | 21.61 | 22.13 | 21.18 | 20.69 | 20.84 |       | 21.03  | 21.36 | 21.37 | 21.21 | 22.13 |       |
|         |             | b                   | 21.77 | 22.29 | 21.35 | 20.89 | 21.04 |       | 21.23  | 21.42 | 21.86 | 21.26 | 22.06 |       |
| 8 weeks | <i>Ppib</i> | a                   | 23.11 | 22.82 | 23.50 | 23.61 | 22.43 | 22.82 | 22.59  | 22.39 | 22.53 | 22.57 | 23.02 | 23.94 |
|         |             | b                   | 23.19 | 23.05 | 23.41 | 23.74 | 22.56 | 22.90 | 22.65  | 22.38 | 22.46 | 22.68 | 22.94 | 24.12 |
|         | <i>Cd47</i> | a                   | 20.84 | 20.93 | 21.21 | 21.26 | 20.59 | 20.92 | 21.00  | 20.75 | 21.04 | 21.11 | 21.30 | 22.43 |
|         |             | b                   | 21.21 | 21.09 | 21.47 | 21.42 | 21.05 | 21.20 | 21.19  | 21.03 | 21.36 | 21.36 | 21.58 | 22.50 |

**Figure 4A**

| Gene          | Technical replicate | PBS   | Malat1_3 |
|---------------|---------------------|-------|----------|
| <i>Ppib</i>   | a                   | 23.22 | 23.61    |
|               | b                   | 23.14 | 23.64    |
| <i>Malat1</i> | a                   | 17.52 | 19.30    |
|               | b                   | 17.57 | 19.33    |

**Supplementary Table S2–Continued.** Raw Ct values of RT-qPCR analysis (Page 2/3).

**Figure 5A**

| Gene  | Technical replicate | PBS   |       |       |       |       |       | Mfap4_4 |       |       |       |       |       |
|-------|---------------------|-------|-------|-------|-------|-------|-------|---------|-------|-------|-------|-------|-------|
|       |                     | 1     | 2     | 3     | 4     | 5     | 6     | 1       | 2     | 3     | 4     | 5     | 6     |
| Ppib  | a                   | 24.24 | 23.76 | 24.05 | 24.25 | 24.63 | 24.56 | 24.55   | 24.35 | 24.68 | 24.10 | 25.11 | 24.83 |
|       | b                   | 24.07 | 23.70 | 23.84 | 24.07 | 24.51 | 24.37 | 24.59   | 24.30 | 24.68 | 24.13 | 25.12 | 24.71 |
| Mfap4 | a                   | 22.53 | 21.64 | 22.51 | 22.15 | 22.53 | 22.92 | 26.34   | 25.66 | 26.37 | 25.39 | 26.47 | 26.13 |
|       | b                   | 22.60 | 21.71 | 22.61 | 22.18 | 22.67 | 22.90 | 26.43   | 25.87 | 26.49 | 25.44 | 26.67 | 26.11 |

**Figure 5B**

| qPCR Batch | Gene   | Technical replicate | NTC_2 (10 nmol) |       |       |       |       | NTC_2 (20 nmol) |       |       |       |       | Adam33_1 (2.5 nmol) |       |       |       |       | Adam33_1 (5 nmol) |       |       |       |       | Adam33_1 (10 nmol) |       |       |       |       | Adam33_1 (20 nmol) |   |   |   |   |
|------------|--------|---------------------|-----------------|-------|-------|-------|-------|-----------------|-------|-------|-------|-------|---------------------|-------|-------|-------|-------|-------------------|-------|-------|-------|-------|--------------------|-------|-------|-------|-------|--------------------|---|---|---|---|
|            |        |                     | 1               | 2     | 3     | 4     | 5     | 1               | 2     | 3     | 4     | 5     | 1                   | 2     | 3     | 4     | 5     | 1                 | 2     | 3     | 4     | 5     | 1                  | 2     | 3     | 4     | 5     | 1                  | 2 | 3 | 4 | 5 |
| a          | Ppib   | a                   | 24.32           | 24.13 | 23.84 | 24.31 | 24.31 | 24.17           | 24.20 | 24.07 | 24.28 | 24.60 | 24.21               | 24.21 | 23.78 | 23.34 | 24.48 | 24.62             | 24.28 | 23.91 | 23.88 | 24.62 | 24.01              | 23.23 | 23.90 | 23.12 | 22.81 |                    |   |   |   |   |
|            |        | b                   | 24.51           | 24.06 | 23.69 | 24.36 | 24.18 | 24.25           | 24.13 | 24.11 | 24.33 | 24.52 | 24.12               | 24.16 | 23.55 | 23.26 | 24.34 | 24.67             | 24.23 | 23.62 | 24.07 | 24.70 | 24.05              | 23.36 | 24.02 | 23.21 | 23.02 |                    |   |   |   |   |
|            | Adam33 | a                   | 30.18           | 30.34 | 30.13 | 30.94 | 30.72 | 30.18           | 30.46 | 29.92 | 30.58 | 30.58 | 31.33               | 31.38 | 31.47 | 31.65 | 31.33 | 32.23             | 32.04 | 32.37 | 32.34 | 32.41 | 33.00              | 33.00 | 33.23 | 33.09 | 33.11 |                    |   |   |   |   |
|            |        | b                   | 30.24           | 30.62 | 30.11 | 31.09 | 30.44 | 30.10           | 30.25 | 30.10 | 30.46 | 30.47 | 31.17               | 31.45 | 31.34 | 31.79 | 31.20 | 32.13             | 32.17 | 32.10 | 32.34 | 32.12 | 32.81              | 32.45 | 33.20 | 33.04 | 33.39 |                    |   |   |   |   |
| b          | Ppib   | a                   | 24.35           | 24.04 | 23.60 | 24.27 | 24.26 |                 |       |       |       |       |                     |       |       |       |       |                   |       |       |       |       |                    |       |       |       |       |                    |   |   |   |   |
|            |        | b                   | 24.40           | 24.06 | 23.62 | 24.19 | 24.17 |                 |       |       |       |       |                     |       |       |       |       |                   |       |       |       |       |                    |       |       |       |       |                    |   |   |   |   |
|            | Adam33 | a                   | 30.83           | 30.57 | 30.68 | 31.56 | 31.34 |                 |       |       |       |       |                     |       |       |       |       |                   |       |       |       |       |                    |       |       |       |       |                    |   |   |   |   |
|            |        | b                   | 30.85           | 31.03 | 30.82 | 31.45 | 31.44 |                 |       |       |       |       |                     |       |       |       |       |                   |       |       |       |       |                    |       |       |       |       |                    |   |   |   |   |

**Figure 5C**

| Time    | Gene   | Technical replicate | NTC_2 |       |       |       |       | Adam33_1 |       |       |       |       |
|---------|--------|---------------------|-------|-------|-------|-------|-------|----------|-------|-------|-------|-------|
|         |        |                     | 1     | 2     | 3     | 4     | 5     | 1        | 2     | 3     | 4     | 5     |
| 2 days  | Ppib   | a                   | 25.37 | 25.27 | 25.09 | 24.91 | 24.55 | 25.06    | 24.44 | 24.41 | 24.36 | 24.83 |
|         |        | b                   | 25.37 | 25.43 | 25.22 | 24.93 | 24.76 | 25.02    | 24.54 | 24.50 | 24.47 | 24.83 |
|         | Adam33 | a                   | 31.44 | 31.04 | 31.33 | 31.16 | 31.43 | 32.60    | 32.39 | 32.50 | 34.15 | 33.14 |
|         |        | b                   | 31.32 | 31.05 | 31.40 | 31.15 | 31.20 | 32.71    | 32.79 | 32.27 | 33.35 | 33.23 |
| 1 Week  | Ppib   | a                   | 24.27 | 23.99 | 23.66 | 24.22 | 24.22 | 23.97    | 23.21 | 23.95 | 23.27 | 23.12 |
|         |        | b                   | 24.29 | 24.08 | 23.71 | 24.37 | 24.27 | 23.84    | 23.28 | 24.08 | 23.37 | 23.12 |
|         | Adam33 | a                   | 30.72 | 30.86 | 30.60 | 31.27 | 31.11 | 33.49    | 33.47 | 32.89 | 33.59 | 33.57 |
|         |        | b                   | 30.56 | 30.76 | 30.66 | 31.56 | 30.97 | 33.04    | 33.15 | 33.38 | 33.48 | 33.30 |
| 2 Weeks | Ppib   | a                   | 24.42 | 23.89 | 23.88 | 23.89 | 24.25 | 24.39    | 24.84 | 24.29 | 24.22 | 25.26 |
|         |        | b                   | 24.44 | 24.36 | 23.83 | 23.91 | 24.27 | 24.53    | 24.96 | 24.49 | 24.25 | 25.09 |
|         | Adam33 | a                   | 30.62 | 30.46 | 30.15 | 30.32 | 30.65 | 31.65    | 32.01 | 32.05 | 32.15 | 33.45 |
|         |        | b                   | 30.47 | 30.73 | 30.50 | 30.31 | 30.43 | 32.16    | 32.08 | 32.18 | 31.95 | 33.02 |
| 3 Weeks | Ppib   | a                   | 23.90 | 23.57 | 24.83 | 24.48 | 24.36 | 25.09    | 25.06 | 24.71 | 24.20 | 25.11 |
|         |        | b                   | 23.94 | 23.52 | 24.80 | 24.62 | 24.33 | 25.08    | 24.94 | 24.81 | 24.23 | 25.16 |
|         | Adam33 | a                   | 30.65 | 30.13 | 31.34 | 30.80 | 31.00 | 32.13    | 32.13 | 32.25 | 31.96 | 32.70 |
|         |        | b                   | 30.56 | 30.24 | 31.34 | 30.90 | 30.92 | 32.19    | 32.07 | 32.22 | 31.88 | 32.62 |
| 4 Weeks | Ppib   | a                   | 25.40 | 25.97 | 25.92 | 25.01 | 25.47 | 25.47    | 26.34 | 24.50 | 24.96 | 25.67 |
|         |        | b                   | 25.44 | 26.01 | 25.95 | 25.07 | 25.40 | 25.48    | 26.14 | 24.58 | 24.95 | 25.55 |
|         | Adam33 | a                   | 31.49 | 31.85 | 31.39 | 31.41 | 31.25 | 32.46    | 33.15 | 32.05 | 32.98 | 32.67 |
|         |        | b                   | 31.48 | 32.07 | 31.23 | 31.17 | 31.06 | 32.48    | 32.73 | 32.50 | 32.56 | 32.66 |

**Supplementary Figure S3A**

| Gene | Technical replicate | PBS   |       |       | Cd47_1 |       |       | Cd47_2 |       |       | Cd47_3 |       |       | Cd47_4 |       |       |
|------|---------------------|-------|-------|-------|--------|-------|-------|--------|-------|-------|--------|-------|-------|--------|-------|-------|
|      |                     | 1     | 2     | 3     | 1      | 2     | 3     | 1      | 2     | 3     | 1      | 2     | 3     | 1      | 2     | 3     |
| Ppib | a                   | 24.04 | 23.57 | 23.52 | 24.02  | 24.30 | 24.47 | 24.91  | 24.57 | 24.19 | 24.43  | 24.07 | 24.30 | 24.22  | 24.24 | 24.28 |
|      | b                   | 24.02 | 23.64 | 23.56 | 24.00  | 24.26 | 24.33 | 24.71  | 24.65 | 24.14 | 24.46  | 24.08 | 24.37 | 24.10  | 24.12 | 24.42 |
| Cd47 | a                   | 21.68 | 21.29 | 21.52 | 21.93  | 22.23 | 22.22 | 22.93  | 23.05 | 22.53 | 22.49  | 22.17 | 22.41 | 22.46  | 22.30 | 22.89 |
|      | b                   | 21.71 | 21.37 | 21.37 | 21.73  | 22.20 | 22.12 | 23.03  | 23.06 | 22.47 | 22.44  | 22.14 | 22.52 | 22.50  | 22.52 | 22.79 |

**Supplementary Figure S3C**

| Gene  | Technical replicate | PBS   |       | Mfap4_1 |       | Mfap4_2 | Mfap4_3 | Mfap4_4 | Mfap4_5 | Mfap4_6 | Mfap4_7 | Mfap4_8 | Mfap4_9 |
|-------|---------------------|-------|-------|---------|-------|---------|---------|---------|---------|---------|---------|---------|---------|
|       |                     | 1     | 2     | 1       | 2     | 1       | 1       | 1       | 1       | 1       | 1       | 1       |         |
| Ppib  | a                   | 25.13 | 25.12 | 24.56   | 24.14 | 24.18   | 24.31   | 25.08   | 25.15   | 24.23   | 24.20   | 24.99   | 25.15   |
|       | b                   | 25.19 | 25.17 | 24.58   | 24.25 | 24.47   | 24.33   | 25.14   | 25.14   | 24.40   | 24.21   | 25.10   | 25.29   |
| Mfap4 | a                   | 24.20 | 24.99 | 25.17   | 25.14 | 25.36   | 24.80   | 26.59   | 26.48   | 24.95   | 24.89   | 25.39   | 28.38   |
|       | b                   | 24.15 | 24.93 | 25.13   | 25.09 | 25.23   | 24.74   | 26.69   | 26.49   | 24.73   | 24.83   | 25.23   | 28.27   |
| Il6   | a                   | 35.26 | 34.45 | 34.22   | 32.37 | 31.98   | 34.22   | 31.97   | 35.18   | 33.80   | 31.07   | 31.31   | ND      |
|       | b                   | 35.82 | 34.71 | 34.48   | 33.00 | 32.48   | 35.39   | 31.95   | 35.96   | 34.14   | 31.16   | 31.64   | 30.27   |
